# Supplementary material for: Li2MnO3: a rare red-coloured manganese(iv) oxide exhibiting tunable red–yellow–green emission
Source: Royal Society of Chemistry journal article supplement (doi:10.1039/c5tc00616c), 2015-01-01
Supplement: c5tc00616c1.pdf [file c5tc00616c1.pdf]

**Fig. S3** MnO<sub>6</sub> octahedra in Li<sub>2</sub>MnO<sub>3</sub> (Sample d): (a) Mn at Mn (4g) site, (b) Mn at Li (2b) site in [Li<sub>1/3</sub>Mn<sub>2/3</sub>] layer and (c) Mn at Li (4h) site in the interslab. Mn-O bond lengths and octahedral distortion parameter  $\Delta$  are indicated.  $\Delta = 1/6 \sum \{ (r - \langle r \rangle) / \langle r \rangle \}^2 \cdot 10^3$  where  $r$  is bond length and  $\langle r \rangle$  is average bond length.

**Fig. S4** Excitation and Emission spectra of Li<sub>2</sub>MnO<sub>3</sub> (Sample c). Calculated energy levels of Mn(IV) in Mn(IV) site (4g) are shown by black vertical bars (|).

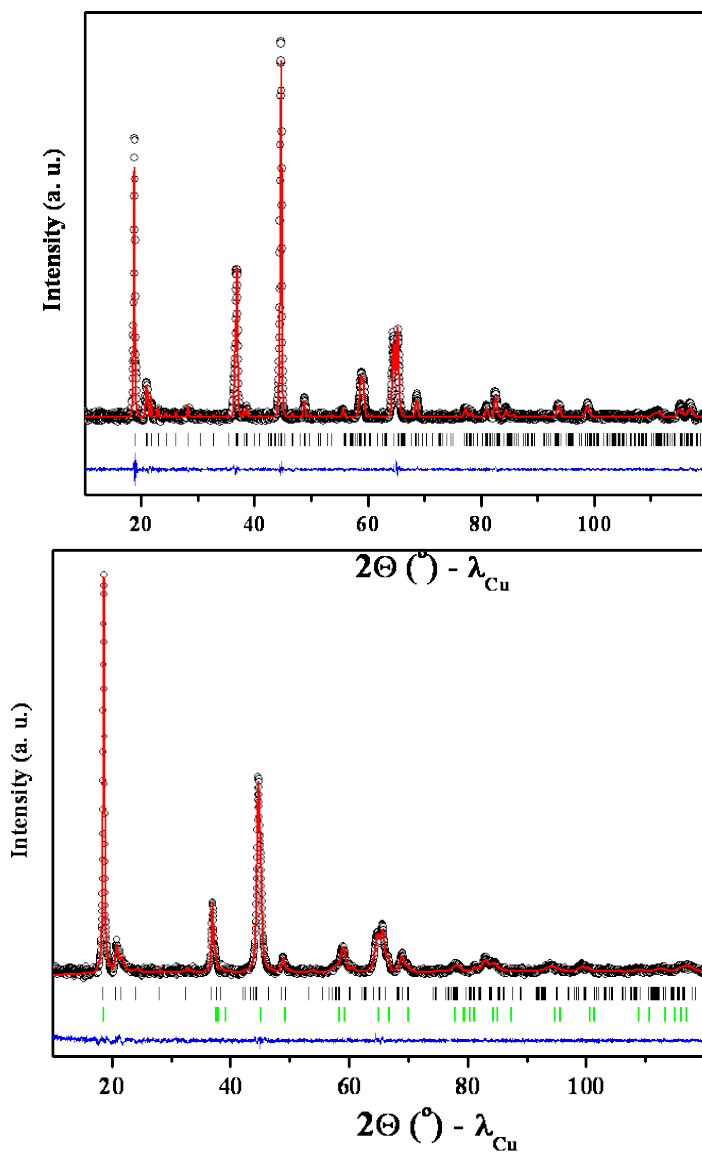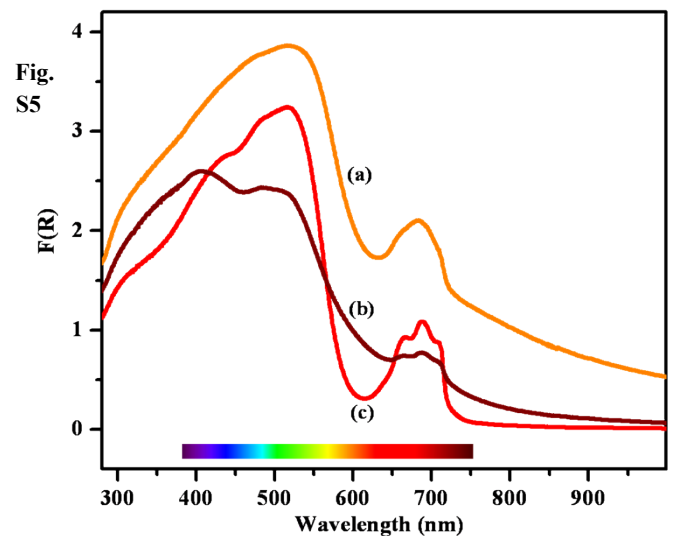

**Fig. S5** Rietveld refinement of Li<sub>2</sub>Mg<sub>0.67</sub>Al<sub>0.66</sub>Mn<sub>0.67</sub>O<sub>4</sub>. Observed (o), calculated (—) and difference (bottom blue line) profiles are shown. The vertical bars (|) indicate Bragg reflections.

**Fig. S6** Rietveld refinement of Li<sub>3</sub>AlMnO<sub>5</sub>. Observed (o), calculated (—) and difference (bottom blue line) profiles are shown.

profiles are shown. The vertical black bars (|) and green bars (|) indicate Bragg reflections of  $\text{Li}_3\text{AlMnO}_5$  and  $\alpha\text{-LiAlO}_2$  phases respectively.

**Fig. S7** UV-vis spectra of (a)  $\text{Li}_2\text{Mg}_{0.67}\text{Al}_{0.66}\text{Mn}_{0.67}\text{O}_4$  (b)  $\text{Li}_3\text{AlMnO}_5$  and (c)  $\text{Li}_2\text{MnO}_3$  (Sample c).

**Table S1.** Rietveld refinement of  $\text{Li}_2\text{Mg}_{0.67}\text{Al}_{0.66}\text{Mn}_{0.67}\text{O}_4$

| <i>Atom</i>  | <i>Site</i> | <i>x</i> | <i>y</i>  | <i>z</i> | <i>U<sub>iso</sub>(Å<sup>2</sup>)</i> | <i>Occupancy</i>        |
|--------------|-------------|----------|-----------|----------|---------------------------------------|-------------------------|
| Li1          | 4e          | 0        | 0.104(10) | 0.25     | 0.059(4)                              | 1.0                     |
| Li2          | 4e          | 0        | 0.396(4)  | 0.25     | 0.079(2)                              | 1.0                     |
| Li3          | 4e          | 0        | 0.7932(4) | 0.25     | 0.029(2)                              | 1.0                     |
| Mg1/Al1 /Mn1 | 4d          | 0.25     | 0.25      | 0.5      | 0.011(2)                              | 0.34(1)/0.32(1)/0.34(1) |
| Mg2/Al2/Mn2  | 8f          | 0.233(2) | 0.075(2)  | 0.010(1) | 0.009(1)                              | 0.33(1)/0.34(1)/0.33(1) |
| O1           | 8f          | 0.171(3) | 0.223(3)  | 0.131(1) | 0.010(5)                              | 1                       |
| O2           | 8f          | 0.169(2) | 0.580(4)  | 0.120(1) | 0.021(3)                              | 1                       |
| O3           | 8f          | 0.138(3) | 0.913(4)  | 0.116(1) | 0.010(3)                              | 1                       |

Space group  $C2/c$  :  $a = 4.959(1) \text{ \AA}$ ,  $b = 8.560(1) \text{ \AA}$ ,  $c = 9.609(1) \text{ \AA}$ ,  $\beta = 99.71(1)^\circ$

Reliability Factors (%):  $R_p = 2.72$ ,  $R_{wp} = 4.31$ ,  $\chi^2 = 5.62$

$2 \times \text{Li}(1) - \text{O}(1) = 1.896(1) \text{ \AA}$ ,  $2 \times \text{Li}(1) - \text{O}(2) = 1.900(1) \text{ \AA}$ ,  $2 \times \text{Li}(1) - \text{O}(3) = 2.260(1) \text{ \AA}$ ,  $\langle \text{Li}(1) - \text{O} \rangle = 2.019 \text{ \AA}$ , BVS  $\text{Li}(1) - \text{O} = 1.478$ ;

$2 \times \text{Li}(2) - \text{O}(1) = 2.061(1) \text{ \AA}$ ,  $2 \times \text{Li}(2) - \text{O}(2) = 2.262(1) \text{ \AA}$ ,  $2 \times \text{Li}(2) - \text{O}(3) = 2.027(1) \text{ \AA}$ ,  $\langle \text{Li}(2) - \text{O} \rangle = 2.117 \text{ \AA}$ , BVS  $\text{Li}(2) - \text{O} = 1.072$ ;

$2 \times \text{Li}(3) - \text{O}(1) = 1.895(1) \text{ \AA}$ ,  $2 \times \text{Li}(3) - \text{O}(2) = 2.437(1) \text{ \AA}$ ,  $2 \times \text{Li}(3) - \text{O}(3) = 1.865(1) \text{ \AA}$ ,  $\langle \text{Li}(3) - \text{O} \rangle = 2.066 \text{ \AA}$ , BVS  $\text{Li}(3) - \text{O} = 1.453$ ;

$2 \times \text{Mg}(1)/\text{Al}(1)/\text{Mn}(1) - \text{O}(1) = 2.251(1) \text{ \AA}$ ,  $2 \times \text{Mg}(1)/\text{Al}(1)/\text{Mn}(1) - \text{O}(2) = 1.936(1) \text{ \AA}$ ,  $2 \times \text{Mg}(1)/\text{Al}(1)/\text{Mn}(1) - \text{O}(3) = 1.925(1) \text{ \AA}$ ,

$\langle \text{Mg}(1)/\text{Al}(1)/\text{Mn}(1) - \text{O} \rangle = 2.037 \text{ \AA}$ , BVS  $\text{Mg}(1)/\text{Al}(1)/\text{Mn}(1) - \text{O} = 2.554$ ;

$\text{Mg}(2)/\text{Al}(2)/\text{Mn}(2) - \text{O}(1) = 1.854(1) \text{ \AA}$ ,  $\text{Mg}(2)/\text{Al}(2)/\text{Mn}(2) - \text{O}(1) = 2.216(1) \text{ \AA}$ ,  $\text{Mg}(2)/\text{Al}(2)/\text{Mn}(2) - \text{O}(2) = 2.240(1) \text{ \AA}$ ,  $\text{Mg}(2)/\text{Al}(2)/\text{Mn}(2) - \text{O}(2) = 1.940(1) \text{ \AA}$ ,  $\text{Mg}(2)/\text{Al}(2)/\text{Mn}(2) - \text{O}(3) = 1.835(1) \text{ \AA}$ ,  $\text{Mg}(2)/\text{Al}(2)/\text{Mn}(2) - \text{O}(3) = 2.031(1) \text{ \AA}$ ,  $\langle \text{Mg}(2)/\text{Al}(2)/\text{Mn}(2) - \text{O} \rangle = 2.019 \text{ \AA}$ , BVS

$\text{Mg}(2)/\text{Al}(2)/\text{Mn}(2) - \text{O} = 2.707$ ;

**Table S2.** Rietveld refinement of  $\text{Li}_3\text{AlMnO}_5$

| Atom        | Site | x        | y        | z        | $U_{iso}(\text{Å}^2)$ | Occupancy               |
|-------------|------|----------|----------|----------|-----------------------|-------------------------|
| Li1/Mn1/Al1 | 2b   | 0        | 0.5      | 0        | 0.022(2)              | 0.80(1)/0.10(1)/0.10(1) |
| Li2         | 2c   | 0        | 0        | 0.5      | 0.033(8)              | 1.0                     |
| Li3         | 4h   | 0        | 0.713(2) | 0.5      | 0.031(6)              | 1.0                     |
| Li4/Mn2/Al2 | 4g   | 0        | 0.175(1) | 0        | 0.026(1)              | 0.10(1)/0.55(1)/0.35(1) |
| O1          | 4i   | 0.209(2) | 0        | 0.207(1) | 0.010(2)              | 0.95(1)                 |
| O2          | 8j   | 0.250(1) | 0.338(1) | 0.238(1) | 0.012(1)              | 0.93(1)                 |

Space group  $C2/m$  :  $a = 4.994(1) \text{ \AA}$ ,  $b = 8.530(1) \text{ \AA}$ ,  $c = 5.028(1) \text{ \AA}$ ,  $\beta = 109.15(1)^\circ$

Reliability Factors (%):  $R_p = 1.66$ ,  $R_{wp} = 2.18$ ,  $\chi^2 = 1.73$

$2 \times \text{Li}(1)/\text{Mn}(1)/\text{Al}(1) - \text{O}(1) = 2.032(1) \text{ \AA}$ ,  $4 \times \text{Li}(1)/\text{Mn}(1)/\text{Al}(1) - \text{O}(2) = 1.979(1) \text{ \AA}$ ;  $\langle \text{Li}(1)/\text{Mn}(1)/\text{Al}(1) - \text{O} \rangle = 1.997 \text{ \AA}$ , BVS  $\text{Li}(1)/\text{Mn}(1)/\text{Al}(1) - \text{O} = 1.675$ ;

$2 \times \text{Li}(2) - \text{O}(1) = 2.059(1) \text{ \AA}$ ;  $4 \times \text{Li}(2) - \text{O}(2) = 2.030(1) \text{ \AA}$ ,  $\langle \text{Li}(2) - \text{O} \rangle = 2.040 \text{ \AA}$ , BVS  $\text{Li}(2) - \text{O} = 1.274$ ;

$2 \times \text{Li}(3) - \text{O}(1) = 2.479(1) \text{ \AA}$ ;  $2 \times \text{Li}(3) - \text{O}(2) = 2.127(1) \text{ \AA}$ ,  $2 \times \text{Li}(3) - \text{O}(2) = 1.825(1) \text{ \AA}$ ,  $\langle \text{Li}(3) - \text{O} \rangle = 2.144 \text{ \AA}$ , BVS  $\text{Li}(3) - \text{O} = 1.22$ ;

$2 \times \text{Li}(4)/\text{Mn}(2)/\text{Al}(2) - \text{O}(1) = 1.920(1) \text{ \AA}$ ,  $2 \times \text{Li}(4)/\text{Mn}(2)/\text{Al}(2) - \text{O}(2) = 1.977(1) \text{ \AA}$ ,  $2 \times \text{Li}(4)/\text{Mn}(2)/\text{Al}(2) - \text{O}(3) = 1.982(1) \text{ \AA}$ ,  $\langle \text{Li}(4)/\text{Mn}(2)/\text{Al}(2) - \text{O} \rangle = 1.960 \text{ \AA}$ , BVS  $\text{Li}(4)/\text{Mn}(2)/\text{Al}(2) - \text{O} = 1.585$ ;
